# Supplementary material for: Influence and reliability of lower-limb arterial occlusion pressure at different body positions
Source: PeerJ. 2018 May 2;6:e4697. doi: 10.7717/peerj.4697 (PMC5936068; doi:10.7717/peerj.4697)
Supplement: Supplemental Information 1 — Raw data for LOP measurement in different body positions. [file peerj-06-4697-s001.xlsx]

## Sheet: LOP
						Trial 1			Trial 2
						1	2	3
	Blood pressure		RHR	ATT (mm)	Thigh circum (mm)	LOP (mmHg)	LOP (mmHg)	LOP (mmHg)	LOP (mmHg)	LOP (mmHg)	LOP (mmHg)
ID	Sys	Dia	(bpm)	mid point	mid point	Supine	Upright (90)	Standing	Supine	Upright (90)	Standing
1	122	72	74	26.4	53.9	199	209	259	191	211	237
2	120	68	64	10.6	50	169	190	213	155	178	219
3	127	69	66	7.4	54	160	203	221
4	111	71	72	35.2	47.8	200	222	245
5	134	74	62	20	57.4	238	251	285
6	121	70	62	21.2	47.3	181	198	226
7	137	77	57	16.8	61.3	248	253
8	117	70	62	16.4	52.1	193	213	251
9	101	58	71	36.1	51	174	205	207
10	122	71	64	13.4	55.4	202	218	256
11	133	77	48	20.5	69.4	222	245	292
12	101	73	45	14.2	21.3	159	188	204
13	127	68	49	21.8	55.1	233	255	262
14	119	72	50	9.4	50.2	196	207	247
15	125	65	59	25.6	60	190	238	276
16	115	75	81	9	60.1	201	214	270
17	110	66	64	38.6	56.6	265	271	315
18	128	76	59	13.8	58.2	189	200
19	112	73	70	9.8	50.5	242	239	277
20	156	75	69	17.4	63	266	271	317	269	276	321
21	122	80	63	12.5	54	191	220	241
22	136	68	67	16	58	183	191	235
23	126	65	68	8.7	61	183	210	273	179	215	268
24	138	93	75	9.6	54	222	245	286
25	119	68	61	42.3	67	247	257	265	236	245	267
26	134	71	72	11.2	52	203	221	253	210	222	268
27	115	67	56	9.4	54.4	167	185	201	178	193	235
28	120	59	48	18	56.5	183	203	242	195	201	235
29	124	69	67	8	58	187	197	219	193	202	217
30	139	91	78	22.8	62	151	229	253
31	113	68	61		56.4	187	195	201
32	124	74	70	5	57	170	195	207
33	129	77	72	13.5	47.5	206	216	267
34	103	68	60	15	54	167	186	213
35	103	61	58	18	58	176	182	224	179	180	221
36	123	59	67	14	52	194	205	232
37	124	67	65	22.5	54	175	180	218
38	113	65	54	14	57	175	194	221
39	114	70	73	18.8	50.5	147	174	195
40	131	66	70	15.2	64	169	193	214
41	132	76	50	11.6	50	171	191	209
42	127	74	47	7	60	168	202	228
43	136	9	57	21.5	49	197	203
44	125	83	59	6.7	48	162	198	236
45	125	76	78	22	53	153	167
46	120	70	54		62	203	209	255
47	110	60	59	14.5	49	144	167	186
48	131	87	56	10	55	191	223	251
49	124	64	47	5.2	52	168	201	266
50	119	72	61	8.4	53	176	185	201
